# Supplementary material for: miRNA expression profile of bone marrow resident cells from children with neuroblastoma is not significantly different from that of healthy children
Source: PubMed Central journal article supplement (PMC5922374; doi:10.18632/oncotarget.24874), 2018-04-10
Supplement: oncotarget-09-19014-s001.pdf [file oncotarget-09-19014-s001.pdf]

## **miRNA expression profile of bone marrow resident cells from children with neuroblastoma is not significantly different from that of healthy children**

### **SUPPLEMENTARY MATERIALS**

**Supplementary Table 1: MIQE checklist.** See Supplementary\_Table\_1

**Supplementary Table 2: RT-qPCR raw data of miRNA expression in BM resident cells from four healthy children, four children with localized NB and four children with metastatic NB.** See Supplementary\_Table\_2

**Supplementary Table 3: RT-qPCR raw data of miRNA expression in NB primary tumor cells from 12 children with metastatic NB.** See Supplementary\_Table\_3

**Supplementary Table 4: RT-qPCR raw data of miRNA expression in BM-infiltrating NB cells from 12 children with metastatic NB.** See Supplementary\_Table\_4

**Supplementary Table 5: List of unique genes potentially targeted by miR-221 extracted from Targetscan, PicTar and MiRanda databases and list of the genes under-expressed by BM resident cells from children with NB, as compared with healthy children.** See Supplementary\_Table\_5
